# Supplementary material for: STAT, Wingless, and Nurf-38 determine the accuracy of regeneration after radiation damage in Drosophila
Source: PubMed Central journal article supplement (PMC5656321; doi:10.1371/journal.pgen.1007055), 2017-10-13
Supplement: pgen.1007055.s001.pdf [file pgen.1007055.s001.pdf]

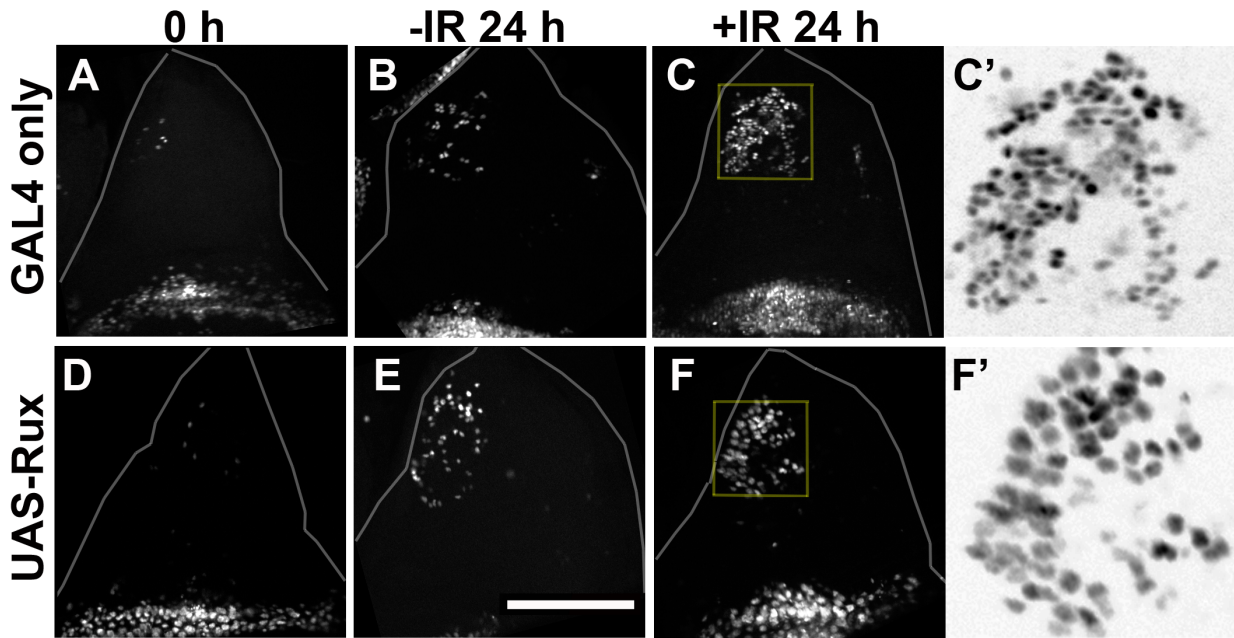

S1 Fig. Rux blocks mitosis. Related to Fig 3.
