# Supplementary material for: STAT, Wingless, and Nurf-38 determine the accuracy of regeneration after radiation damage in Drosophila
Source: PubMed Central journal article supplement (PMC5656321; doi:10.1371/journal.pgen.1007055), 2017-10-13
Supplement: pgen.1007055.s003.pdf [file pgen.1007055.s003.pdf]

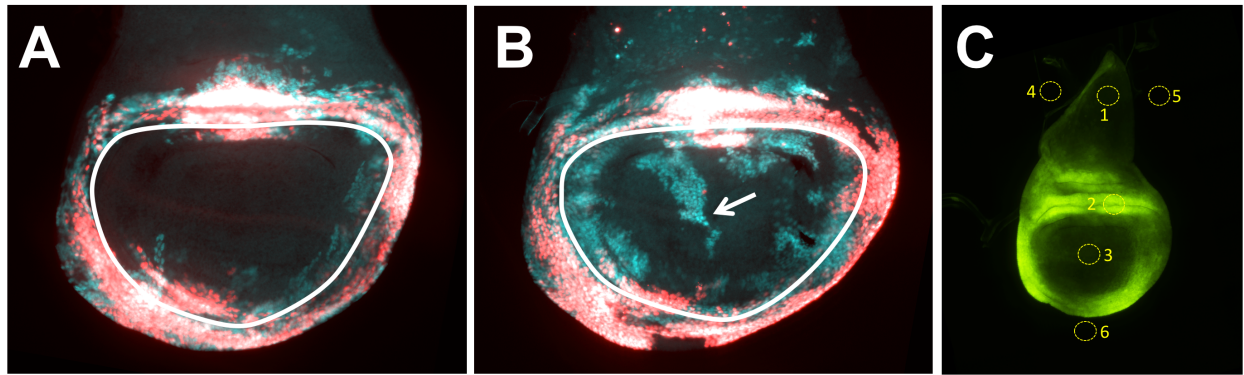

**S3 Fig. Quantification of translocation and STAT-GFP. Related to Fig 5.**
