# Supplementary material for: STAT, Wingless, and Nurf-38 determine the accuracy of regeneration after radiation damage in Drosophila
Source: PubMed Central journal article supplement (PMC5656321; doi:10.1371/journal.pgen.1007055), 2017-10-13
Supplement: pgen.1007055.s004.pdf [file pgen.1007055.s004.pdf]

| Column 1                         | Column 2                      | Column 3                           | Column 4                                                    |
|----------------------------------|-------------------------------|------------------------------------|-------------------------------------------------------------|
| Genotype/Treatment<br>(observed) | p value against<br>(expected) | Class 0-IV<br>separately<br>(Df=4) | <b>IR-induced<br/>classes II-IV<br/>together<br/>(Df=1)</b> |
| E(Pc) RNAi +IR                   | GAL4>G-trace +IR              | 29.800***                          | <b>1.0238 (ns)</b>                                          |
| Set2 RNAi +IR                    | GAL4>G-trace +IR              | 31.850***                          | <b>13.390***</b>                                            |
| Egg RNAi +IR                     | GAL4>G-trace +IR              | 34.490***                          | <b>16.307***</b>                                            |
| Nurf-38 RNAi +IR                 | GAL4>G-trace +IR              | 86.846***                          | <b>44.261***</b>                                            |
| Nurf-38 RNAi #2 +IR              | GAL4>G-trace +IR              | 61.746***                          | <b>19.961***</b>                                            |
| STAT RNAi +IR                    | GAL4>G-trace +IR              | 29.180***                          | <b>11.614***</b>                                            |
| Axin +IR                         | GAL4>G-trace +IR              | 22.469***                          | <b>17.566***</b>                                            |
| STAT RNAi +IR                    | Nurf-38 RNAi; STAT/+<br>+IR   | 9.189 (ns)                         | <b>1.028 (ns)</b>                                           |
| STAT RNAi +IR                    | Nurf-38 STAT RNAi +IR         | 200.255***                         | <b>4.130 (ns)</b>                                           |
| Nurf-38 STAT RNAi +IR            | Nurf-38 RNAi                  | 160.732***                         | <b>61.191***</b>                                            |

**S1 Table. Chi-square values. Related to Fig 1 and 5.**
