# Supplementary material for: STAT, Wingless, and Nurf-38 determine the accuracy of regeneration after radiation damage in Drosophila
Source: PubMed Central journal article supplement (PMC5656321; doi:10.1371/journal.pgen.1007055), 2017-10-13
Supplement: pgen.1007055.s005.pdf [file pgen.1007055.s005.pdf]

| <b>Bloomington stock number</b> | <b>Figures</b>       | <b>Genotype</b>                                                                                   |
|---------------------------------|----------------------|---------------------------------------------------------------------------------------------------|
| 7225                            | Fig. 5               | w[*]; Kr[If-1]/CyO; P{w[+mC]=UAS-Axin.GFP}3/TM3, Sb[1]                                            |
| 26899                           | Fig. 5               | P{w[+mC]=UAS-Stat92E.RNAi}1, w[*]                                                                 |
| 55221                           | Fig. 5               | y[1] v[1]; P{y[+t7.7] v[+t1.8]=TRiP.GLC01838}attP40                                               |
| 31352                           | Fig. 5               | y[1] v[1]; P{y[+t7.7] v[+t1.8]=TRiP.JF01310}attP2                                                 |
| 35444                           | Fig. 5               | y[1] sc[*] v[1]; P{y[+t7.7] v[+t1.8]=TRiP.GL00369}attP2                                           |
| 31341                           | Fig. 5               | y[1] v[1]; P{y[+t7.7] v[+t1.8]=TRiP.JF01299}attP2                                                 |
| 28686                           | Fig. 5               | y[1] v[1]; P{y[+t7.7] v[+t1.8]=TRiP.JF03101}attP2                                                 |
| 9166                            | Fig. 3, 4            | w[*]; P{w[+mC]=UAS-rux.T}C1/SM6a                                                                  |
| 11681                           | Fig. 5               | ry[506] P{ry[+t7.2]=PZ}Stat92E[06346]/TM3, ry[RK] Sb[1] Ser[1]                                    |
| 26197                           | Fig. 5               | w[1118]; P{w[+mC]=10XStat92E-GFP}1                                                                |
| 37534                           | Fig. 1-6, Fig. S1-S3 | w[*]; P{w[+mW.hs]=GawB}30A/CyO                                                                    |
| 28280                           | Fig. 1-6, Fig. S1-S3 | [*]; P{w[+mC]=UAS-RedStinger}4, P{w[+mC]=UAS-FLP.D}D1, P{w[+mC]=Ubi-p63E(FRT.STOP)Stinger}9F6/CyO |

**S2 Table. Stocks from Bloomington Stock Center used in this work.**
